# Supplementary material for: Impact of liver-specific survival motor neuron (SMN) depletion on central nervous system and peripheral tissue pathology
Source: eLife journal article supplement (doi:10.7554/elife.99141), 2024-09-24
Supplement: fig1-data1 [file elife-99141-fig1-data1-v1.pdf]

## Liver

*Smn*<sup>2B/+</sup>

*Smn*<sup>2B/-</sup>

+/+; *Smn*<sup>2B/F7</sup>

*Alb*<sup>Cre/+</sup>; *Smn*<sup>2B/F7</sup>

$\alpha$ -Tubulin

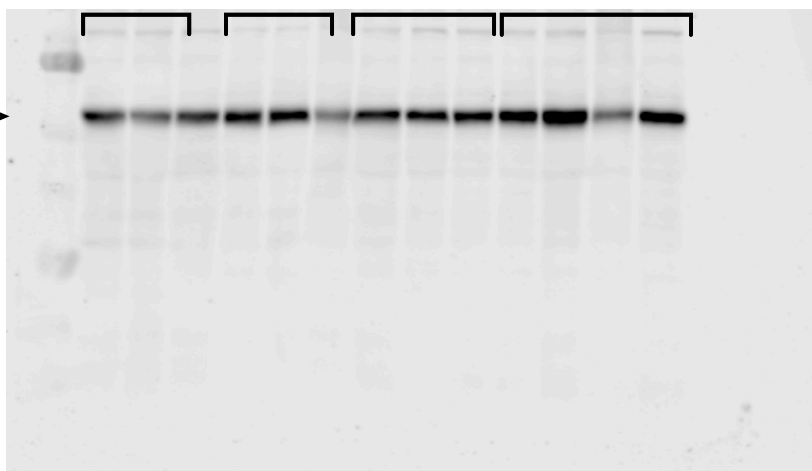

SMN

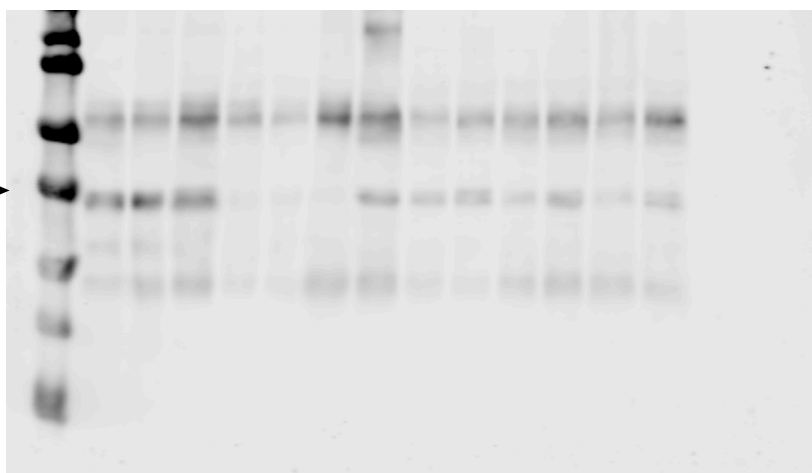

## Muscle

*Smn*<sup>2B/+</sup>

*Smn*<sup>2B/-</sup>

+/+; *Smn*<sup>2B/F7</sup>

*Alb*<sup>Cre/+</sup>; *Smn*<sup>2B/F7</sup>

$\alpha$ -Tubulin

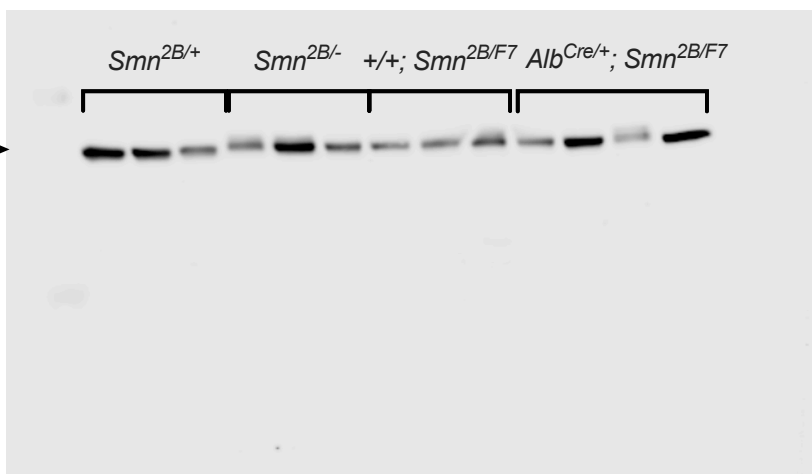

SMN

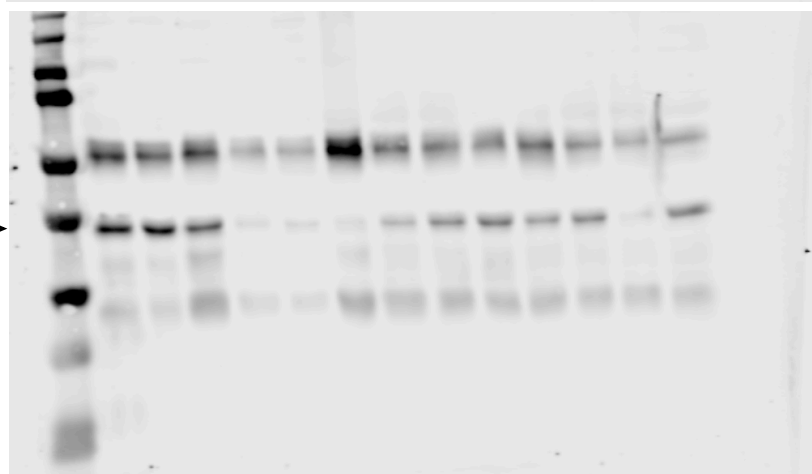

## Pancreas

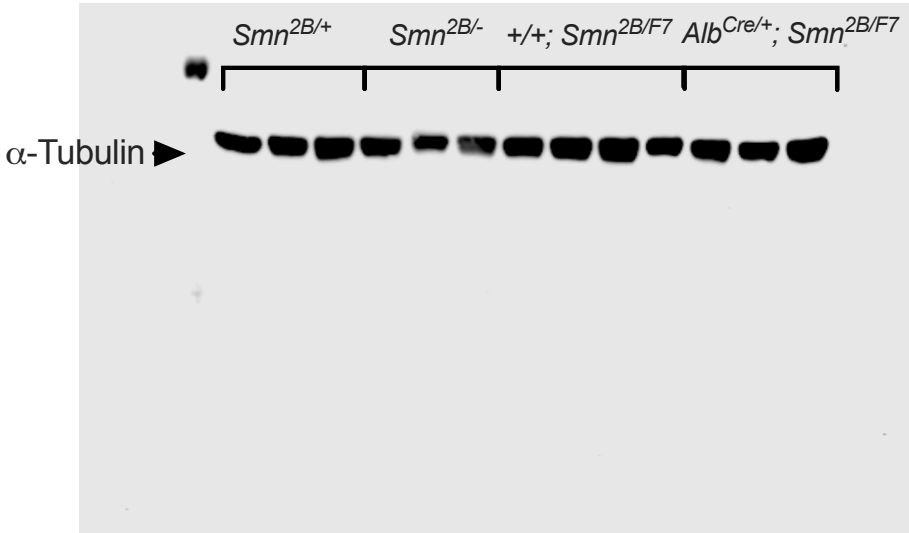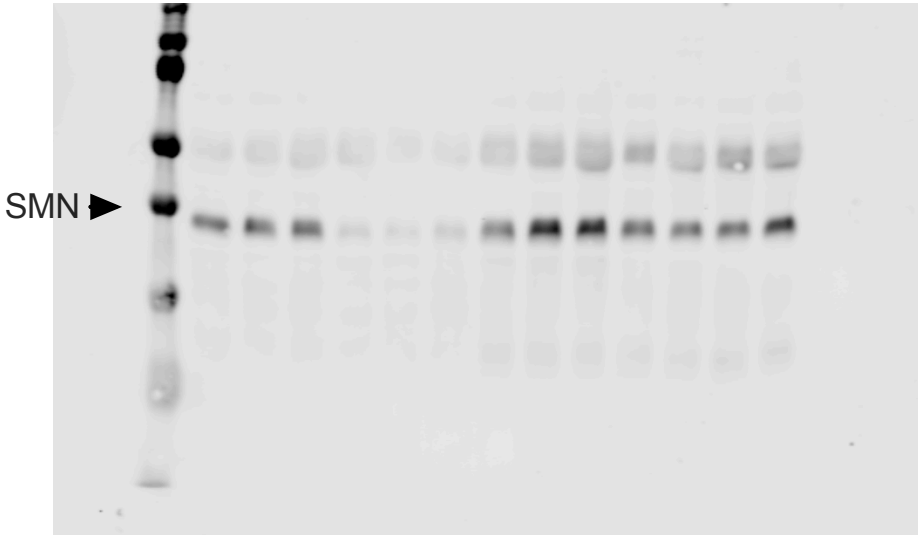

## Spinal cord

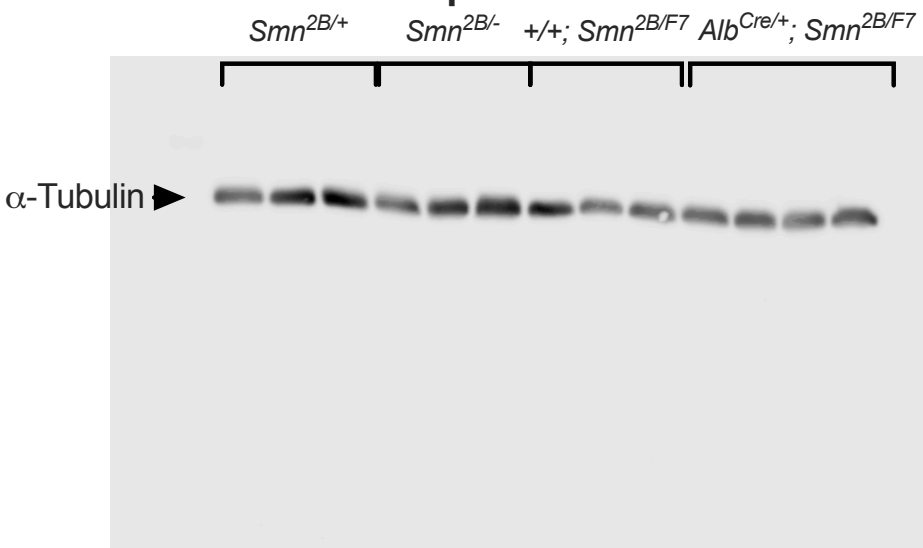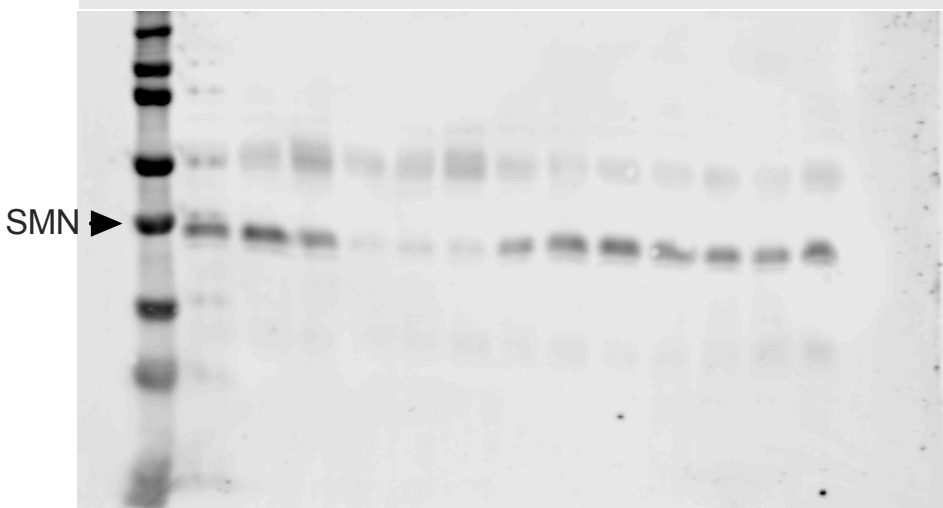

# Brain

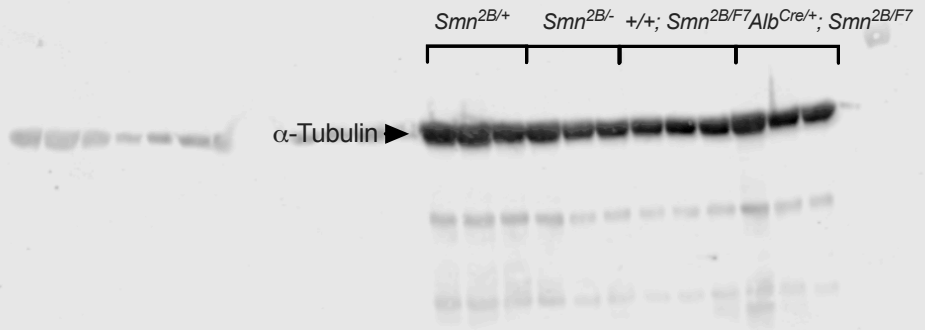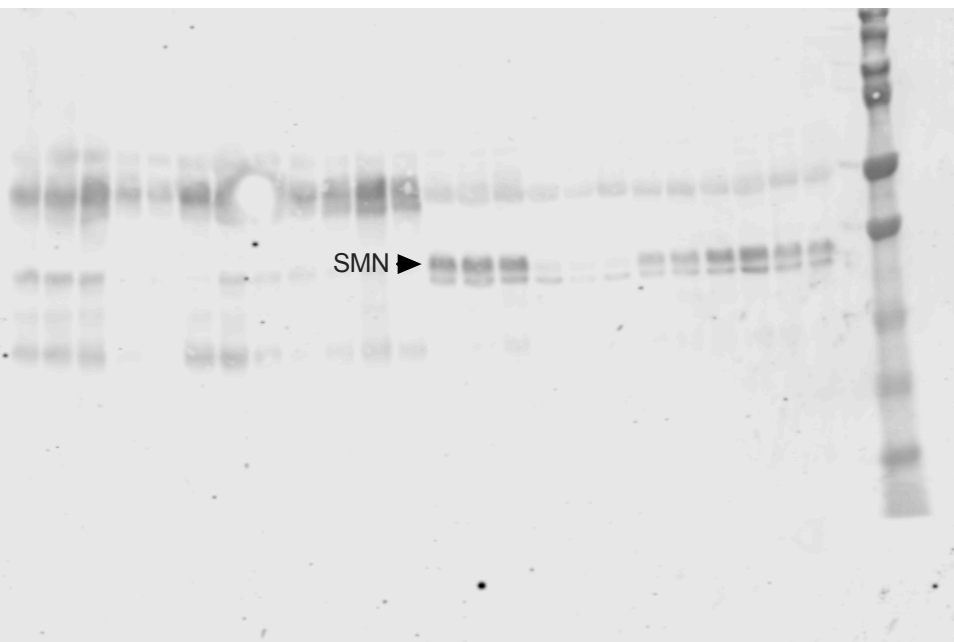

**Figure 1- Source Data 1.** Original membranes corresponding to Figure 1, panels D-H. Molecular weight markers were employed. The membranes correspond to each tissue separately (liver, brain, skeletal muscle, spinal cord, and pancreas) for tubulin and SMN.
