# Supplementary material for: Impact of liver-specific survival motor neuron (SMN) depletion on central nervous system and peripheral tissue pathology
Source: eLife journal article supplement (doi:10.7554/elife.99141), 2024-09-24
Supplement: fig2-data1 [file elife-99141-fig2-data1-v1.pdf]

# Heme oxygenase (HO)

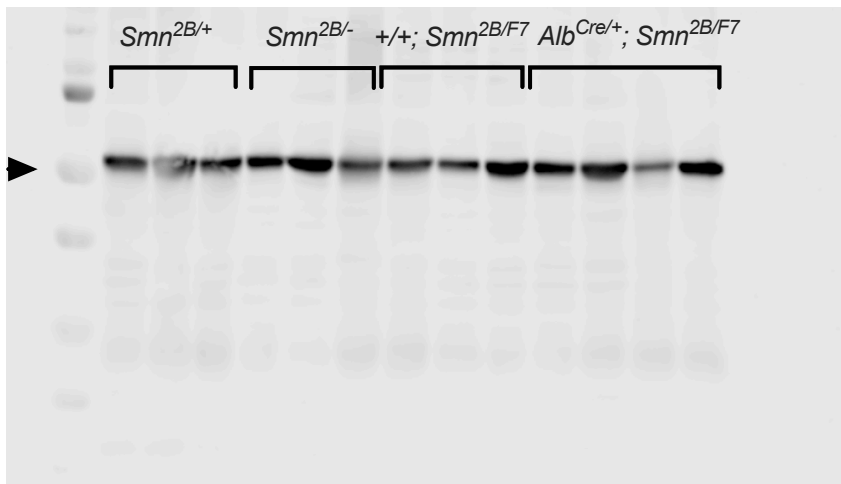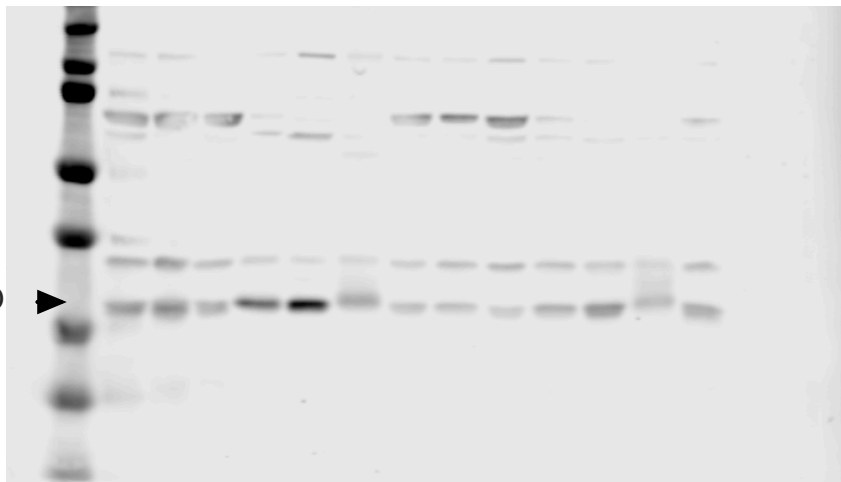

# P62

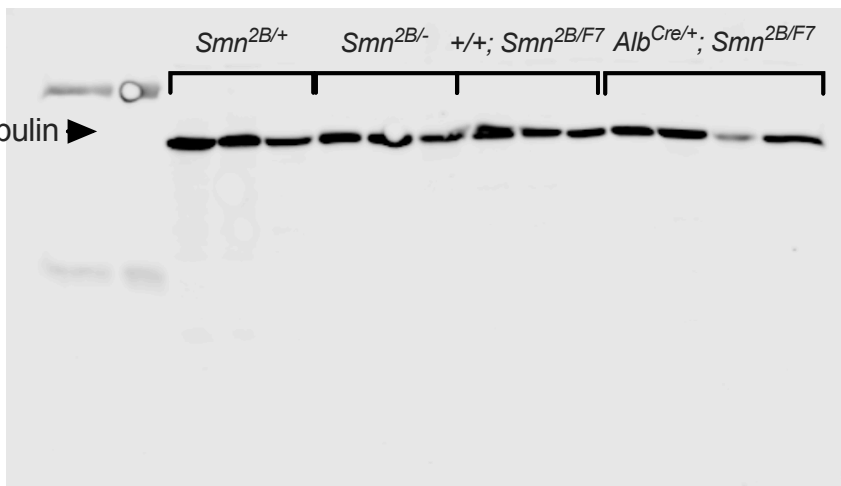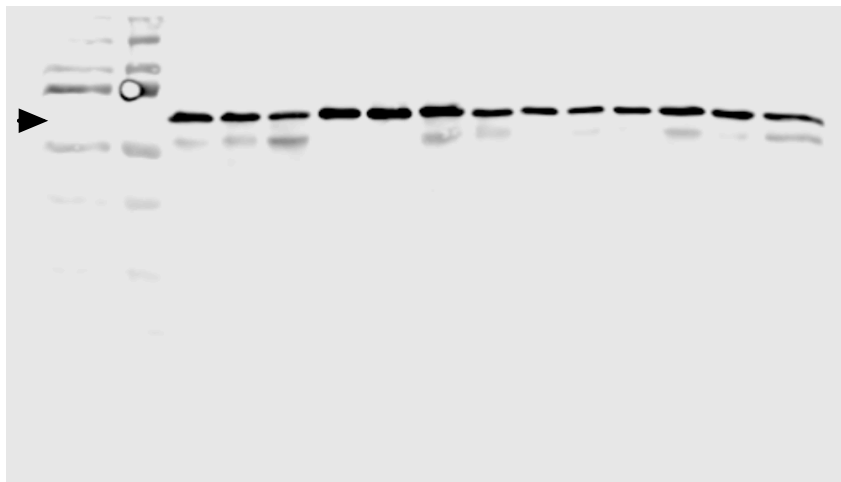

# Transferrin

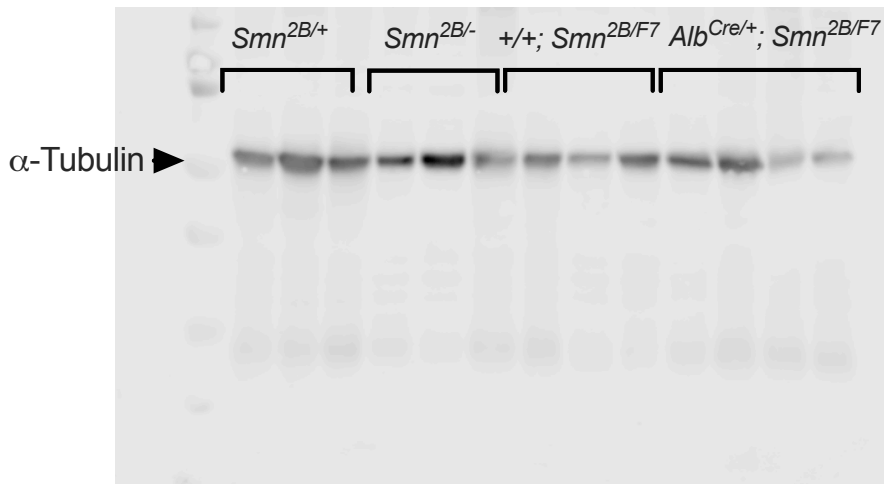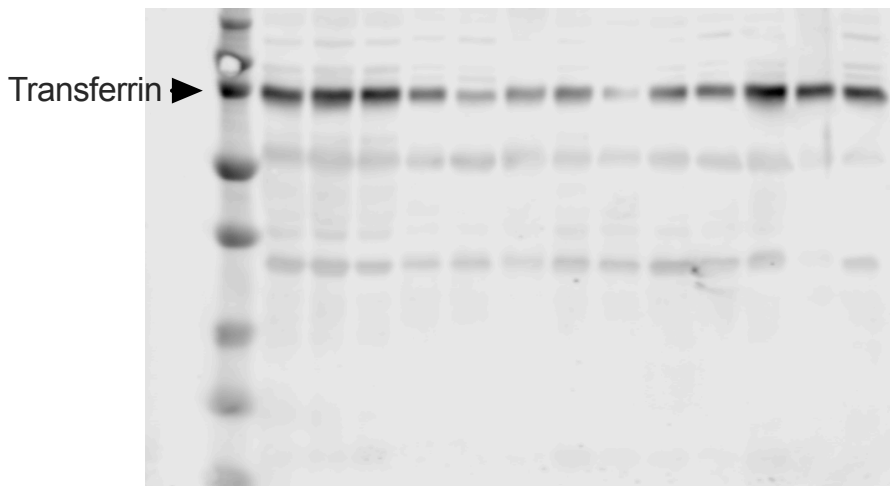

**Figure 2 - Source Data 1.** Original membranes corresponding to Figure 2, panels C-E. Molecular weight markers were employed. The membranes correspond to Heme oxygenase, P62, and transferrin separately. The blots for the tubulin controls are also shown.
