# Supplementary material for: Impact of liver-specific survival motor neuron (SMN) depletion on central nervous system and peripheral tissue pathology
Source: eLife. 2025 Feb 20;13:RP99141. doi: 10.7554/eLife.99141 (PMC11841985; doi:10.7554/eLife.99141)
Supplement: Figure 1—source data 3. [file elife-99141-fig1-data3.xlsx]

## Sheet: Figure 1
FIGURE 1 (SMN PROTEIN LEVELS)
(D) LIVER	2B/+	2B/-	+/+;Smn2B/F7	AlbCre/+;Smn2B/F7
SMN (NORMALIZED TO 𝛼-TUBULIN	0.322132	0.088796	0.240741	0.080128
	0.628755	0.078261	0.164486	0.055
	0.369615	0.0479167	0.171429	0.07754
	0.12981	0.0402817
	0.158239
(E) BRAIN	2B/+	2B/-	+/+;Smn2B/F7	AlbCre/+;Smn2B/F7
SMN (NORMALIZED TO 𝛼-TUBULIN	0.0273016	0.0155718	0.025463	0.0304438
	0.0305174	0.0203361	0.0262857	0.0248424
	0.0341975	0.0170047	0.0353576	0.0298984
(F) MUSCLE	2B/+	2B/-	+/+;Smn2B/F7	AlbCre/+;Smn2B/F7
SMN (NORMALIZED TO 𝛼-TUBULIN	0.17513	0.110509	0.21319	0.223433
	0.180921	0.047524	0.234474	0.10452
	0.291904	0.111602	0.192523	0.175879
				0.094841
(G) SC	2B/+	2B/-	+/+;Smn2B/F7	AlbCre/+;Smn2B/F7
SMN (NORMALIZED TO 𝛼-TUBULIN	0.047042	0.015449	0.016626	0.027879
	0.039483	0.010994	0.044828	0.026316
	0.022154	0.007714	0.041722	0.026677
				0.027428
(H) PANCREAS	2B/+	2B/-	+/+;Smn2B/F7	AlbCre/+;Smn2B/F7
SMN (NORMALIZED TO 𝛼-TUBULIN	0.233036	0.109351	0.374046	0.314578
	0.308673	0.143909	0.421218	0.270355
	0.391104	0.180117	0.477477	0.239259
			0.24955
