# Supplementary material for: Impact of liver-specific survival motor neuron (SMN) depletion on central nervous system and peripheral tissue pathology
Source: eLife. 2025 Feb 20;13:RP99141. doi: 10.7554/eLife.99141 (PMC11841985; doi:10.7554/eLife.99141)
Supplement: Figure 2—source data 3. [file elife-99141-fig2-data3.xlsx]

## Sheet: Figure 2
FIGURE 2
B	2B/+	2B/-	+/+;Smn2B/F7	AlbCre/+;Smn2B/F7
Triglycerides(ug/mg)	20.43	195.42	2.6	45.95
	0.79	140.32	0.15	10.19
	8.11	151.38	0.66	75.72
			1.44	21.91
C	2B/+	2B/-	+/+;Smn2B/F7	AlbCre/+;Smn2B/F7
HO (NORMALIZED TO 𝛼-TUBULIN	0.31882	0.442922	0.212894	0.230245
	0.366469	0.407895	0.273764	0.246981
	0.207194	0.2893	0.138186	0.388535
				0.201087
D	2B/+	2B/-	+/+;Smn2B/F7	AlbCre/+;Smn2B/F7
Transferrin (NORMALIZED TO 𝛼-TUBULIN	2.29539	1.18895	1.16049	1.14396
	1.7289	0.419643	0.636771	2.40088
	1.89933	0.874302	1.13151	4.2515
				4.55279
E	2B/+	2B/-	+/+;Smn2B/F7	AlbCre/+;Smn2B/F7
P62 (NORMALIZED TO 𝛼-TUBULIN	1.25893	3.8118	1.99269	1.77966
	1.56171	4.9616	1.90909	2.09613
	1.89417	5.47368	1.69383	8.35616
				2.32653
F	2B/+	2B/-	+/+;Smn2B/F7	AlbCre/+;Smn2B/F7
IGF1 (pg/m)L	14682.9	1090.23	9310.94	4206.86
	14675.2	720.434	4849.05	8416.13
	13966.1	1991.13	10243.8	2080.91
				12129.3
				13225
