# Supplementary material for: Impact of liver-specific survival motor neuron (SMN) depletion on central nervous system and peripheral tissue pathology
Source: eLife. 2025 Feb 20;13:RP99141. doi: 10.7554/eLife.99141 (PMC11841985; doi:10.7554/eLife.99141)
Supplement: Figure 3—source data 1. [file elife-99141-fig3-data1.xlsx]

## Sheet: Figure 3
FIGURE 3
B	2B/+	2B/-	+/+;Smn2B/F7	AlbCre/+;Smn2B/F7
Insulin+ cellls (%)	72.619	54.8263	61.9048	58.5455
	77.6316	58.3643	83.871	54.0426
	77.9801	61.082	67.6259	48.9474
			77.0021	40.5751
C	2B/+	2B/-	+/+;Smn2B/F7	AlbCre/+;Smn2B/F7
Glucose (mmol/L)	14.7	3.8	9	7.6
	10.2	4.4	11.1	7.2
	15.7	5.8	13.3	7.4
	13.7	5.1	14.3	6.8
			13.3	5.4
			9.4	6.9
				8.9
				12.1
D	2B/+	2B/-	+/+;Smn2B/F7	AlbCre/+;Smn2B/F7
Insulin (pg/mL)	1009.62	876.57	2119.94	1457.8
	743.35	1131.11	1221.42	1465.39
	2043.07	1480.55	1820.65	1800.29
E	2B/+	2B/-	+/+;Smn2B/F7	AlbCre/+;Smn2B/F7
c-Peptide (pg/mL)	440.32	136.07	552.18	378.94
	437.58	54.85	386.54	425.68
	529.47	229.33	401.59	371.3
F	2B/+	2B/-	+/+;Smn2B/F7	AlbCre/+;Smn2B/F7
Glucagon+ Cells (%)	27.381	45.1737	38.0952	59.4249
	22.3684	41.6357	16.129	41.4545
	22.0199	38.918	32.3741	45.9574
			22.9979	51.0526
G	2B/+	2B/-	+/+;Smn2B/F7	AlbCre/+;Smn2B/F7
Glucagon (pg/mL)	68.95	355.73	48.02	343.38
	47.03	254.32	51.09	305.18
	47.64	310.63	41.14	382.2
H	2B/+	2B/-	+/+;Smn2B/F7	AlbCre/+;Smn2B/F7
Active GLP-1 (pg/mL)	380.14	556.79	413.05	541.75
	370.48	482.79	321.82	466.15
	386.51	604.41	353.26	511.2
I	2B/+	2B/-	+/+;Smn2B/F7	AlbCre/+;Smn2B/F7
PP (pg/mL)	56.39	26.59	63.97	53.05
	54.17	19.79	55.73	55.06
	58.81	31.71	50.09	44.94
J	2B/+	2B/-	+/+;Smn2B/F7	AlbCre/+;Smn2B/F7
Active Amylin (pg/mL)	251.54	78.47	277.15	174.64
	255.5	53.82	167.08	230.65
	257.95	110.65	201.29	168.36
