# Supplementary material for: Impact of liver-specific survival motor neuron (SMN) depletion on central nervous system and peripheral tissue pathology
Source: eLife. 2025 Feb 20;13:RP99141. doi: 10.7554/eLife.99141 (PMC11841985; doi:10.7554/eLife.99141)
Supplement: Figure 4—source data 1. [file elife-99141-fig4-data1.xlsx]

## Sheet: Figure 4
FIGURE 4
B	2B/+	2B/-	+/+;Smn2B/F7	AlbCre/+;Smn2B/F7
#Motor neurons	14	3.89	13	6
	8.16667	4.64	12.2857	5.83333
	9.41667	2.92	8.22222	10
	9.16667		10.8571	6.71429
	7			8.14286
				6.66667
				6.75
				11.3333
				10.1429
				9.875
