# Supplementary material for: Impact of liver-specific survival motor neuron (SMN) depletion on central nervous system and peripheral tissue pathology
Source: eLife. 2025 Feb 20;13:RP99141. doi: 10.7554/eLife.99141 (PMC11841985; doi:10.7554/eLife.99141)
Supplement: Figure 5—source data 1. [file elife-99141-fig5-data1.xlsx]

## Sheet: Figure 5
FIGURE 5
B	2B/+	2B/-	+/+;Smn2B/F7	AlbCre/+;Smn2B/F7
NF accumulation (%)	8.85417	71.3115	6.57277	21.8341
	7.62332	49.3671	3.82166	1.76991
	9.55882	45.7516	7.34463	5.91716
C	2B/+	2B/-	+/+;Smn2B/F7	AlbCre/+;Smn2B/F7
NMJ occupancy (%)	98.9664	68.652	95.4649	99.1323
	93.0314	81.9425	93.3434	99.1209
	98.6681	68.9223	98.8796	94.3343
