# Supplementary material for: Impact of liver-specific survival motor neuron (SMN) depletion on central nervous system and peripheral tissue pathology
Source: eLife. 2025 Feb 20;13:RP99141. doi: 10.7554/eLife.99141 (PMC11841985; doi:10.7554/eLife.99141)
Supplement: Figure 6—source data 1. [file elife-99141-fig6-data1.xlsx]

## Sheet: Figure 6
FIGURE 6
B	2B/+	2B/-	+/+;Smn2B/F7	AlbCre/+;Smn2B/F7
Muscle fiber size (µm2)	227.854	150.458	358.88	353.943
	324.54	141.586	339.23	189.659
	354.35	181.656	347.072	369.58
	366.777	134.699		341.82
C	2B/+				2B/-				+/+;Smn2B/F7			AlbCre/+;Smn2B/F7
%Frequency distribution	Animal 1	Animal 2	Animal 3	Animal 4	Animal 1	Animal 2	Animal 3	Animal 4	Animal 1	Animal 2	Animal 3	Animal 1	Animal 2	Animal 3	Animal 4
	93.537	93.537	113.327	111.059	24.033	49.534	50.473	49.743	103.522	140.966	91.334	146.644	85.412	112.479	151.392
	98.481	98.481	124.244	118.242	44.933	52.569	69.045	55.629	127.898	150.658	116.15	167.202	88.447	113.801	153.056
	99.313	99.313	125	130.86	55.799	57.121	69.565	55.866	143.169	153.007	116.444	168.279	96.963	137.002	156.531
	100.879	100.879	127.457	135.539	63.043	57.561	72.574	66.024	144.637	159.321	132.45	178.019	100.536	142.435	165.048
	101.809	101.809	137.571	151.56	63.924	59.519	74.575	67.258	150.511	160.79	136.414	178.704	101.711	152.714	166.81
	107.732	107.732	148.299	155.624	65.491	62.505	75.803	69.584	157.266	169.16	143.169	181.347	109.004	154.182	174.201
	112.088	112.088	151.087	162.287	68.623	70.826	82.589	72.432	165.489	174.593	150.364	182.963	111.403	158.147	180.466
	113.752	113.752	151.749	180.293	69.211	72.735	82.845	73.761	166.957	177.089	150.511	188.592	111.598	175.621	181.201
	120.605	120.605	155.151	181.758	75.133	73.616	84.357	74.188	167.104	177.823	151.539	189.717	113.997	179.438	182.963
	121.779	121.779	160.917	194.943	75.28	77.189	90.943	75.47	170.041	183.697	158.881	190.549	114.878	184.725	188.396
	127.163	127.163	161.295	198.866	83.356	78.217	91.418	77.463	184.872	188.689	160.937	193.535	119.283	185.459	188.689
	129.953	129.953	161.767	207.892	85.167	79	95.274	78.745	196.619	188.689	176.649	197.206	119.919	186.193	188.983
	136.61	136.61	165.028	214.13	89.475	84.041	95.652	79.362	204.842	190.158	179.879	198.723	127.996	194.122	190.256
	136.659	136.659	170.321	214.178	89.719	84.922	98.251	81.498	205.576	197.059	181.201	199.213	129.121	198.528	193.829
	139.792	139.792	180.388	221.739	90.356	85.804	99.858	83.444	208.66	202.199	182.375	201.318	130.002	217.47	194.857
	141.994	141.994	184.499	222.306	93.341	85.999	102.762	83.491	211.303	207.338	184.431	201.318	130.443	218.498	195.444
	142.484	142.484	186.059	222.732	94.516	89.279	105.657	88	214.093	210.715	186.487	209.394	133.233	219.379	197.059
	142.924	142.924	186.862	225.331	96.914	90.796	105.766	89.045	214.68	212.477	189.717	209.394	134.065	220.407	199.115
	144.931	144.931	187.004	226.938	99.411	93.194	109.499	89.377	221.435	220.26	190.305	217.176	134.456	222.316	201.171
	147.183	147.183	193.431	242.155	102.347	93.782	110.072	91.275	228.777	224.518	197.353	219.966	137.051	228.483	203.765
	147.917	147.917	193.431	244.707	104.501	95.789	110.775	93.316	229.805	225.399	198.675	223.197	139.547	231.567	206.457
	147.917	147.917	205.718	256.664	104.599	97.746	111.011	93.981	232.888	231.567	205.723	224.665	140.134	238.174	216.638
	150.462	150.462	206.144	260.728	104.893	97.844	111.258	94.503	233.476	237.147	215.708	226.574	140.477	248.306	217.47
	151.147	151.147	209.074	262.004	105.627	98.187	111.437	94.503	235.091	238.909	216.883	227.015	141.064	251.243	221.435
	152.958	152.958	210.066	262.287	106.508	100.194	111.78	94.74	239.79	240.964	225.987	235.238	141.211	251.39	231.273
	153.203	153.203	211.957	262.902	107.291	101.809	111.815	95.263	240.23	243.608	252.271	239.007	141.554	254.767	231.714
	155.259	155.259	215.265	263.422	108.613	102.69	113.516	99.155	241.992	249.187	253.593	242.041	142.141	256.383	233.916
	155.65	155.65	216.352	267.108	109.053	104.354	116.21	100.484	242.139	249.775	257.117	243.754	142.484	259.319	238.909
	157.119	157.119	223.299	274.386	109.738	106.263	121.89	101.386	251.243	249.922	257.264	245.37	143.218	262.256	241.111
	157.51	157.51	224.197	278.166	111.598	108.906	124.976	101.528	254.914	250.509	265.34	248.6	147.183	266.515	247.866
	165.097	165.097	224.386	286.673	114.878	108.906	129.537	102.003	257.557	250.95	272.388	269.109	149.483	269.451	251.096
	169.258	169.258	228.025	291.021	115.318	109.885	132.143	102.477	260.788	252.124	277.234	280.171	149.483	270.186	253.005
	173.614	173.614	233.412	293.762	115.367	110.571	133.129	104.091	261.375	252.858	292.065	280.758	149.826	273.563	255.355
	173.81	173.81	240.217	294.329	117.129	113.997	135.681	104.85	262.109	253.446	306.749	290.303	150.56	280.611	259.907
	175.523	175.523	242.769	303.403	119.821	114.095	137.554	105.657	265.927	255.942	307.483	290.89	154.769	283.695	261.669
	176.257	176.257	243.384	308.79	120.654	114.144	138.171	107.271	267.249	256.529	311.448	298.232	156.287	285.897	262.893
	178.557	178.557	244.282	309.83	121.681	115.857	141.352	109.597	276.647	265.046	314.384	301.903	160.496	291.184	264.018
	180.809	180.809	244.471	313.091	123.248	116.053	141.399	109.597	279.583	266.661	315.265	302.05	163.873	292.505	265.34
	184.284	184.284	246.503	314.698	125.255	116.934	141.399	109.977	282.52	274.444	317.615	302.735	165.831	301.756	267.542
	187.906	187.906	250.284	317.58	125.842	118.745	141.731	111.163	282.961	278.849	324.37	307.14	165.88	312.182	271.409
	188.053	188.053	252.174	319.376	126.429	120.605	145.747	111.543	291.477	287.66	324.712	307.336	166.37	317.615	271.556
	189.473	189.473	262.287	332.325	126.527	122.611	146.762	112.208	299.26	289.422	329.068	311.741	168.523	320.845	277.087
	190.745	190.745	277.079	333.081	127.017	123.248	146.786	113.157	301.169	312.035	329.068	317.468	170.432	336.41	278.702
	191.969	191.969	291.304	335.161	128.387	123.786	149.847	114.011	304.546	312.035	333.327	319.769	171.558	338.76	289.275
	195.444	195.444	292.722	345.369	134.408	124.471	154.309	119.327	306.896	313.797	339.494	324.516	173.663	345.808	304.399
	195.738	195.738	310.728	352.457	137.1	125.01	154.679	119.992	324.516	314.531	341.697	334.355	173.956	353.003	306.015
	197.598	197.598	315.974	353.686	137.198	127.604	155.306	122.128	326.572	314.678	345.074	336.264	174.789	357.017	307.483
	199.311	199.311	319.754	366.493	139.057	128.191	156.682	122.318	327.894	320.552	345.368	350.605	177.089	361.961	317.468
	206.751	206.751	324.669	367.628	139.253	129.415	158.696	122.46	328.334	323.782	348.011	357.653	177.872	362.842	321.873
	207.974	207.974	333.79	369.376	140.624	129.415	161.334	122.745	333.18	326.132	353.297	359.024	180.271	375.617	330.537
	209.002	209.002	345.321	371.597	140.673	132.45	165.511	124.026	334.061	327.16	354.325	361.961	181.739	376.645	338.76
	209.296	209.296	345.841	372.59	141.603	132.841	166.84	124.169	345.515	334.355	355.059	362.499	182.865	382.176	342.137
	210.813	210.813	345.983	384.357	143.414	134.505	168.526	124.359	345.515	340.962	357.702	363.576	186.829	383.106	344.633
	211.107	211.107	353.828	390.643	145.323	135.435	178.089	124.454	354.178	343.899	360.492	372.093	187.808	387.951	345.808
	213.359	213.359	355.246	393.195	145.665	135.435	178.828	125.26	360.199	350.654	361.961	375.47	190.598	396.468	345.955
	216.54	216.54	356.427	394.943	148.455	135.925	179.893	126.495	365.632	353.444	364.016	377.036	191.186	397.79	351.975
	219.036	219.036	376.229	400.945	151.882	137.491	181.744	127.776	371.799	353.884	370.477	378.407	195.542	401.901	360.492
	219.966	219.966	377.93	406.191	152.42	139.351	182.656	129.77	373.855	355.353	372.093	381.343	197.793	405.278	369.009
	220.847	220.847	388.658	417.06	154.769	139.547	182.741	129.96	376.938	356.968	375.029	389.469	203.129	409.39	372.68
	223.637	223.637	391.163	423.724	155.406	141.847	184.165	130.102	380.756	363.87	377.085	391.769	203.471	433.765	373.267
	231.175	231.175	391.257	426.181	155.944	142.973	184.168	132.19	383.252	366.659	381.931	393.384	207.534	440.961	384.868
	237.196	237.196	396.408	428.875	159.126	144.588	186.342	133.852	383.399	368.275	385.602	404.544	208.855	445.513	387.56
	238.909	238.909	401.796	430.624	161.377	145.959	188.422	140.924	390.301	372.68	387.804	406.992	212.722	449.918	394.265
	247.328	247.328	403.355	432.75	161.671	150.511	196.031	141.588	394.412	379.581	392.356	407.481	213.456	454.617	395.44
	248.062	248.062	403.403	436.2	164.608	151.686	196.268	149.373	397.79	380.609	393.531	407.628	213.505	454.91	398.083
	250.999	250.999	413.752	437.524	171.069	153.595	197.313	150.702	401.02	384.427	395.146	408.362	214.435	463.133	407.775
	252.271	252.271	415.454	439.509	171.118	155.553	200.398	151.983	403.516	386.923	397.936	411.103	218.694	465.923	409.39
	255.306	255.306	420.936	443.195	171.803	158.049	202.505	156.967	413.208	393.384	398.23	411.446	221.679	471.21	411.152
	265.78	265.78	435.775	445.274	180.662	158.489	204.148	157.964	421.431	398.524	399.111	412.474	223.148	472.091	418.494
	268.277	268.277	436.531	445.747	181.152	160.839	212.359	160.575	428.039	402.782	401.314	413.012	227.259	476.936	421.137
	269.06	269.06	436.815	464.178	181.152	162.601	214.21	162.616	435.234	412.033	401.754	414.578	229.854	477.817	422.018
	275.521	275.521	441.068	464.698	184.039	164.265	219.526	162.616	440.226	413.501	402.342	426.423	229.902	479.139	423.046
	276.206	276.206	441.73	473.393	187.025	168.523	219.669	163.327	446.687	413.795	409.635	426.57	230.49	479.726	424.71
	278.996	278.996	459.641	473.582	190.011	170.873	220.476	163.327	448.156	427.892	413.208	429.654	231.42	483.936	429.066
	279.045	279.045	472.543	475.378	190.354	173.712	223.466	163.422	450.946	432.003	414.529	430.241	231.518	483.936	429.654
	279.437	279.437	474.669	478.781	192.507	174.642	227.93	164.894	452.12	439.933	414.529	432.346	232.154	489.565	431.122
	284.967	284.967	481.474	479.915	193.535	180.515	229.399	165.891	457.847	457.407	416.732	437.73	233.573	493.187	449.184
	286.925	286.925	483.27	480.104	197.549	182.718	230.111	166.27	462.84	463.868	418.494	440.961	235.189	497.934	449.526
	287.317	287.317	486.578	480.246	200.877	184.823	238.322	167.172	478.258	465.189	430.682	452.414	235.385	499.697	457.407
	292.701	292.701	497.495	482.42	204.646	184.872	243.591	167.315	488.684	470.329	438.317	454.47	237.196	502.535	474.587
	295.295	295.295	503.025	484.026	205.968	186.927	244.113	171.207	492.795	476.202	439.198	464.161	241.16	502.584	476.789
	296.274	296.274	507.042	485.586	209.247	187.221	248.053	172.061	493.382	478.111	443.31	469.301	242.629	504.836	484.278
	305.085	305.085	507.703	488.28	211.058	188.934	251.66	173.912	505.13	479.139	448.009	478.16	247.279	507.773	486.921
	314.482	314.482	516.068	492.958	212.575	190.305	252.847	175.384	506.011	480.754	449.477	478.405	248.502	511.444	493.97
	322.265	322.265	523.346	497.212	214.533	190.843	264.792	177.899	508.801	492.942	457.407	487.754	251.243	518.639	495.291
	324.957	324.957	525.614	501.749	218.743	197.94	265.472	181.364	511.15	506.598	469.007	489.614	252.614	519.226	496.76
	328.187	328.187	542.486	518.336	222.854	202.003	277.718	181.649	511.444	531.561	475.174	491.425	254.033	527.596	503.368
	328.726	328.726	570.085	521.408	222.952	207.632	287.923	183.263	514.234	542.721	479.433	495.438	254.523	530.239	504.542
	354.717	354.717	579.868	522.023	232.399	208.17	290.059	184.212	525.247	550.65	496.466	503.955	262.941	539.637	505.13
	362.205	362.205	583.412	523.488	232.692	210.275	300.122	187.06	528.183	556.817	506.011	513.206	269.843	542.819	505.57
	372.631	372.631	587.476	526.607	240.622	212.38	301.356	190.098	594.115	562.838	507.185	520.841	269.99	554.762	523.778
	372.631	372.631	593.431	527.552	243.852	216.589	304.014	197.692	615.847	567.683	513.353	529.065	273.22	555.643	524.953
	376.889	376.889	622.543	538.043	245.321	218.889	319.82	203.815	642.425	578.99	514.968	531.12	284.527	558.286	532.295
	401.803	401.803	650.851	544.093	251.537	223.686	325.231	206.758	652.704	603.659	521.282	535.085	286.142	564.159	537.092
	404.202	404.202	668.715	545.463	260.886	224.567	348.204	220.286	666.8	618.784	530.68	536.553	287.023	570.424	548.643
	404.446	404.446	692.25	551.938	270.088	245.663	380.955	236.898	693.085	619.077	543.161	564.012	289.422	581.633	567.243
	411.641	411.641	754.915	572.212	270.381	254.816	384.61	274.491	704.098	622.895	578.403	566.851	301.903	606.351	594.506
	469.35	469.35	784.168	596.739	278.898	282.471	394.91	293.952	712.027	628.622	614.232	591.472	305.28	611.638	595.436
	526.372	526.372	799.433	599.149	290.254	318.349	405.827	369.706	712.468	628.769	616.875	644.138	331.271	614.966	633.174
	637.188	637.188	826.796	708.081	293.435	450.75	500.425	381.762	782.657	642.425	624.657	911.583	353.835	625.979	652.41
