# Supplementary material for: Impact of liver-specific survival motor neuron (SMN) depletion on central nervous system and peripheral tissue pathology
Source: eLife. 2025 Feb 20;13:RP99141. doi: 10.7554/eLife.99141 (PMC11841985; doi:10.7554/eLife.99141)
Supplement: Figure 7—source data 1. [file elife-99141-fig7-data1.xlsx]

## Sheet: Figure 7
FIGURE 7
C	2B/+	+/+;Smn2B/F7	AlbCre/+;Smn2B/F7
Insulin+ cellls (%)	63.3846	80.3213	57.1429
	72.2222	79.2453	81.8182
	72.2467	70.8333	70.9402
			71.0383
D	2B/+	+/+;Smn2B/F7	AlbCre/+;Smn2B/F7
Glucose (mmol/L)	8.2	5.6	6.9
	9.1	8.6	7.8
	11.4	8.9	7.3
	7.8	7.3	9.3
	5.6	4.8	6.2
	9.8
E	2B/+	+/+;Smn2B/F7	AlbCre/+;Smn2B/F7
Insulin (pg/mL)	1571.31	3723.06	3720.78
	1505.43	3460.43	5221.11
	3576.97	1376.4	8393.54
	4307.61	3495.06	2489.39
	2335.52	1904.15	3315
F	2B/+	+/+;Smn2B/F7	AlbCre/+;Smn2B/F7
c-Peptide (pg/mL)	531.22	680.7	590.36
	400.65	605.04	439.41
	774.32	502.18	569.57
	714.16	633.47	611.08
	599.86	503.95	560.89
G	2B/+	+/+;Smn2B/F7	AlbCre/+;Smn2B/F7
Glucagon+ Cells (%)	36.6154	19.6787	42.8571
	27.7778	20.7547	18.1818
	27.7533	29.1667	29.0598
			28.9617
H	2B/+	+/+;Smn2B/F7	AlbCre/+;Smn2B/F7
Glucagon (pg/mL)	50.25	38.46	53.39
	44.05	48.96	54.28
	51.09	68.21	38.37
	48.32	39.46	60.44
	84.85	66.28	40.88
I	2B/+	+/+;Smn2B/F7	AlbCre/+;Smn2B/F7
Active GLP-1 (pg/mL)	402.22	435.09	414.59
	329.61	381.73	219.65
	543.13	450.73	257.04
	446.29	390.47	444.06
	551.34	423.76	378.53
J	2B/+	+/+;Smn2B/F7	AlbCre/+;Smn2B/F7
PP (pg/mL)	55.73	66.3	63.76
	42.16	63.87	41.79
	77.33	63.76	44.94
	67.56	59.79	68.61
	68.29	62.05	55.06
K	2B/+	+/+;Smn2B/F7	AlbCre/+;Smn2B/F7
Active Amylin (pg/mL)	250.54	265.73	266.21
	216.27	270.52	132.78
	400.74	224.86	169.63
	294.28	254.51	274.32
	347.01	269.09	277.62
