# Supplementary material for: Impact of liver-specific survival motor neuron (SMN) depletion on central nervous system and peripheral tissue pathology
Source: eLife. 2025 Feb 20;13:RP99141. doi: 10.7554/eLife.99141 (PMC11841985; doi:10.7554/eLife.99141)
Supplement: Figure 8—source data 1. [file elife-99141-fig8-data1.xlsx]

## Sheet: Figure 8
FIGURE 8
P19
A	2B/+	2B/-	+/+;Smn2B/F7	AlbCre/+;Smn2B/F7
Leptin (pg/mL)	280.51	362.28	345.59	278.64
	248.48	538.69	229.22	568.98
	568.41	584.97	625.48	295.32
B	2B/+	2B/-	+/+;Smn2B/F7	AlbCre/+;Smn2B/F7
Resistin (pg/mL)	4368.89	3479.11	4456.95	5117.94
	5693.71	6509.64	6082.75	6234.82
	6740.96	8836.39	7467.38	5427.43
C	2B/+	2B/-	+/+;Smn2B/F7	AlbCre/+;Smn2B/F7
Ghrelin (pg/mL)	29.9	4.09	34.93	19.94
	32.62	0	22.07	26.22
	32.7	9.75	22.91	18.52
D	2B/+	2B/-	+/+;Smn2B/F7	AlbCre/+;Smn2B/F7
GIP (pg/mL)	419.49	375.62	1535.27	1025.11
	224.24	1279.16	2854.92	1631.25
	1107.1	1863.94	978.52	37.14
E	2B/+	2B/-	+/+;Smn2B/F7	AlbCre/+;Smn2B/F7
PYY (pg/mL)	76.09	141.38	116.06	126.25
	110.77	116.76	191.46	94.91
	97.65	125.9	85.21	123.49
F	2B/+	2B/-	+/+;Smn2B/F7	AlbCre/+;Smn2B/F7
Secretin (pg/mL)	48.17	22.59	63.85	43.99
	52.89	29.77	41.19	59.28
	57.61	34.87	46.5	33.88
P60
G	2B/+	+/+;Smn2B/F7	AlbCre/+;Smn2B/F7
Leptin (pg/mL)	352.16	1878.35	983.74
	484.76	1396.82	1192.35
	544.41	371.18	1049.04
	477.85	1647.38	367.03
	555.84	561.56	587.25
H	2B/+	+/+;Smn2B/F7	AlbCre/+;Smn2B/F7
Resistin (pg/mL)	16609.6	11889.8	8938.17
	12859.3	8688.53	18129.9
	11301.9	10226.1	9334.34
	16350.7	10013.7	10373.3
	12287.5	14904.6	7578.5
I	2B/+	+/+;Smn2B/F7	AlbCre/+;Smn2B/F7
Ghrelin (pg/mL)	33.24	37.93	8.8
	28.34	34.78	14.42
	41.97	27.67	29.9
	32.3	31.99	35.46
	38.52	33.94	29.82
J	2B/+	+/+;Smn2B/F7	AlbCre/+;Smn2B/F7
GIP (pg/mL)	711.12	347.15	1132.22
	364.35	1259.26	1074.66
	580.46	1727.02	856.86
	995.88	648.47	1228.5
	1071.8	992.22	320.45
K	2B/+	+/+;Smn2B/F7	AlbCre/+;Smn2B/F7
PYY (pg/mL)	80.52	54.59	68.99
	75.71	75.81	51.71
	78.82	66.71	74.4
	78.22	57.55	78.31
	79.93	94.47	58.12
L	2B/+	+/+;Smn2B/F7	AlbCre/+;Smn2B/F7
Secretin (pg/mL)	54.84	65.93	61.22
	49.7	65.1	32.46
	92.07	72.31	62.46
	83.14	64.54	65.93
	94.87	63.71	62.88
