# Supplementary material for: Impact of liver-specific survival motor neuron (SMN) depletion on central nervous system and peripheral tissue pathology
Source: eLife. 2025 Feb 20;13:RP99141. doi: 10.7554/eLife.99141 (PMC11841985; doi:10.7554/eLife.99141)
Supplement: Figure 9—source data 1. [file elife-99141-fig9-data1.xlsx]

## Sheet: Figure 9
FIGURE 9
B	+/+;Smn2B/F7	AlbCre/+;Smn2B/F7
PROBABILITY OF SURVIVAL
	0	0	N=5 PER GROUP	* 0 ANIMALS DIED AT P60
C	Days	+/+; Smn2B/F7					AlbCre/+; Smn2B/F7
WEIGHT (g)	7	5	5	4.2	5.5	5.6	4.3	5.5	5.7	5.3	5.4
	9	6	6	5.2	5.9	6.3	5.4	6.8	7	5.5	6.3
	11	7.2	6.6	6.2	7.8	8.6	6.2	7.8	8.3	7.2	7.4
	13	8.3	7.7	7	9.1	9.6	7.1	8.2	9.4	8.4	9.1
	15	10.5	9.8	8.6	9.7	10.3	8.3	9.7	10.6	8.4	9.2
	17	10.6	10.6	9.1	9.7	10.7	8.4	10.1	10.1	8.7	9.2
	19	11.1	10.4	9.2	10.5	11.6	8.4	10.9	10.5	9.8	10
	21	12.1	11.5	10.9	11.6	13.6	10.2	12	11.4	11.7	12.3
	23	14.4	12.9	12.3	13.6	15.2	11.9	14.4	13.4	13.8	15.3
	25	16.6	14.9	13.5	15.2	16.8	13.8	16.9	16.1	16.4	17.8
	27	23.6	21.7	16.4	17	18.4	19.1	21.9	22.6	18.6	20.4
	29	24.9	22.6	16.9	17.8	18.9	19.7	23.3	24.3	20.4	22.4
	31	25.3	22.9	16.8	18.6	19.8	19.3	23.8	25.4	21.8	24.3
	38	28.4	25.1	18.5	19.4	21	18.8	26.2	28	24.3	26.9
	45	29.7	26.9	18.6	18.6	20.2	18.9	27.6	30.5	25.9	27.9
	52	31.2	27.7	19.3	19.6	21.3	20.4	28.7	31.6	27.4	29.3
	60	31.3	28.4	19.4	19.2	21.1	20.2	28.7	32.1	28.6	29.8
D	+/+;Smn2B/F7	AlbCre/+;Smn2B/F7
%Weight gain at P60	626	469.767
	568	521.818
	461.905	563.158
	349.091	539.623
	376.786	551.852
E	Days	+/+; Smn2B/F7					AlbCre/+; Smn2B/F7
RR - Time to right (sec)	7	2.66667	2.66667	1.33333	2.33333	1	4.66667	2	1	1	2
	9	1	1.66667	1	0.333333	0	1	1.33333	0.333333	1	0.666667
	11	0.333333	0.333333	0.333333	0	0	0	0.666667	0	0	0
	13	0	0	0	0	0	0	0	0	0	0
F	Days	+/+; Smn2B/F7					AlbCre/+; Smn2B/F7
IMG - Time (sec)	13	29	30	12	24	31.6667	22.3333	19	13.3333	15	28.6667
	15	19.3333	22	15	34	35	32.3333	27.3333	24.6667	13	17.3333
	17	25.6667	22.6667	9.33333	60	21.6667	28	18.3333	40	23.6667	33.6667
	19	29.6667	60	46.6667	60	48.6667	34.6667	44.6667	57	58.6667	39
	21	36.6667	60	49	60	60	60	60	60	54.6667	56
	23	40.6667	60	60	60	60	60	60	60	38	52
	25	48.3333	60	60	60	60	60	60	60	33.3333	60
G	Days	+/+; Smn2B/F7					AlbCre/+; Smn2B/F7
Pen test - Time (sec)	19	9.66667	10.3333	22	21.6667	22	16	3.33333	16.6667	12	23.3333
	21	15.1667	18	20	30	24	26.6667	6.66667	24	30	30
	23	7.33333	26.6667	30	24.6667	30	30	30	30	22	30
	25	20.3333	30	30	30	30	30	30	30	25	30
